# Supplementary material
Source: PubMed Central journal article supplement (PMC4432247)
Supplement: NIHMS687763-supplement-Suppl_Fig_1_and_2.pdf [file NIHMS687763-supplement-Suppl_Fig_1_and_2.pdf]

## Distance between the centers of mass of peptides and HA

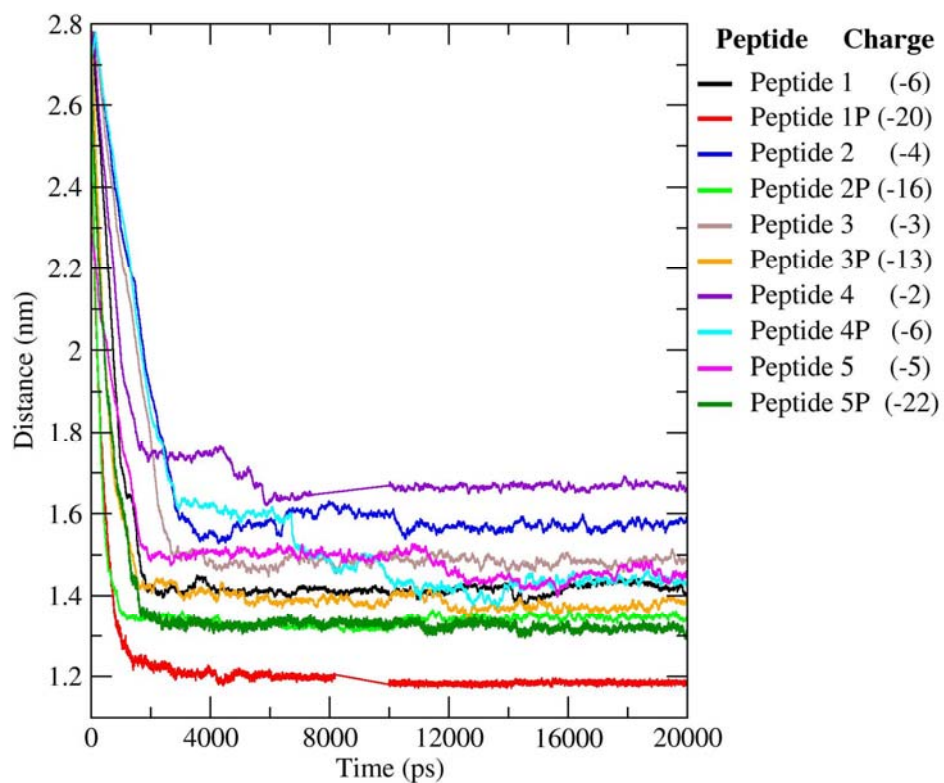

Supplement Figure 1. DPP peptides were attracted to the HA surface. The phosphorylated peptides 1P and 5P were the sequences with greatest predicted affinity for HA.

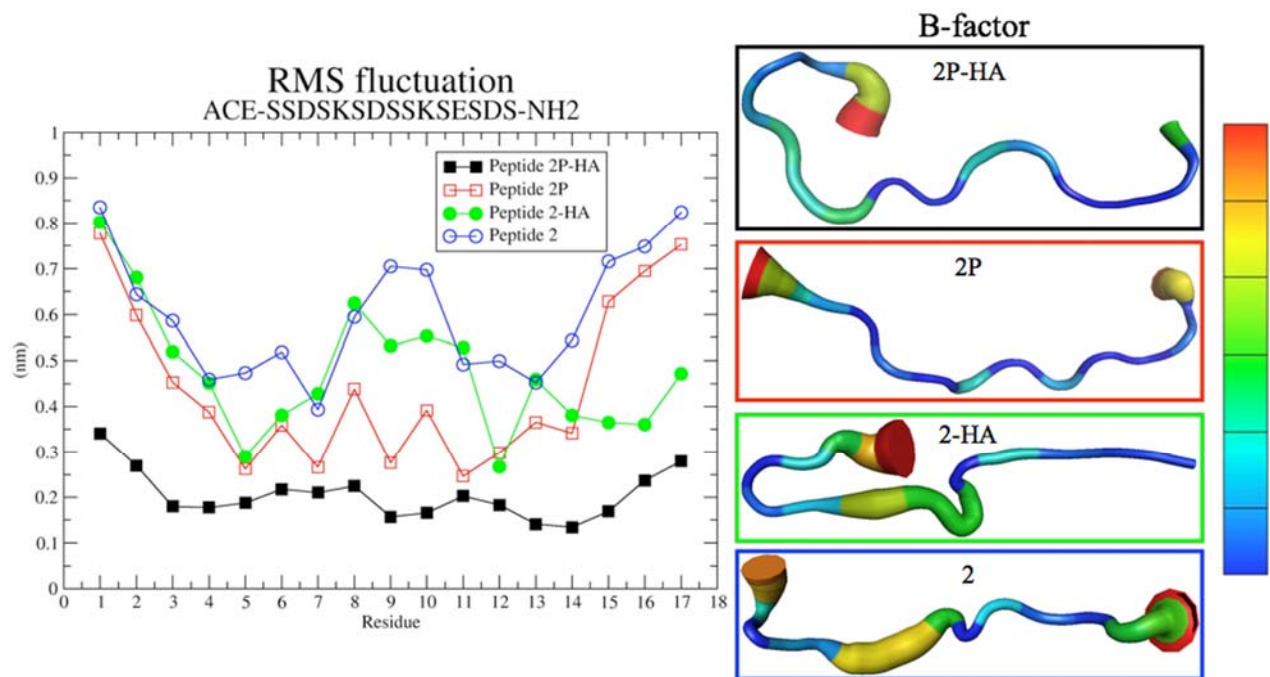

Supplement Figure 2. Root Mean Square Fluctuation plot (RMSF plot) calculated for all individual residues for phosphorylated peptide (peptide 2P-HA and peptide 2P) and unphosphorylated peptide (Peptide 2 and Peptide 2-HA). The B-factor analysis showed the average structures.
